# Supplementary material
Source: MDPI journal article supplement (https://www.mdpi.com/2227-9040/12/1/9)
Supplement: s1 [file s1]

**Supplementary Table S1: Concentration and Attributes of Substances in Sample Analysis**

| Sample         | Nicotine concentration (mg/ml)                                                          | Nicotine | Taurine | Caffeine | Vit<br>E | CBD |
|----------------|-----------------------------------------------------------------------------------------|----------|---------|----------|----------|-----|
| 1202_18_0241   | 10.4442                                                                                 | 1        | 0       | 0        | 0        | 0   |
| 1301_18_0179   | < 5ppm                                                                                  | 0        | 0       | 0        | 0        | 0   |
| 1301_18_0187   | 3.265                                                                                   | 1        | 0       | 0        | 0        | 0   |
| S18FD00652_001 | *                                                                                       | 0        | 0       | 1        | 0        | 0   |
| S18FD00653_001 | *                                                                                       | 1        | 0       | 0        | 0        | 0   |
| S18FD00654_001 | *                                                                                       | 1        | 0       | 0        | 0        | 0   |
| S18FD00658_001 | *                                                                                       | 0        | 0       | 1        | 0        | 0   |
| S18FD00659_001 | *                                                                                       | 1        | 0       | 0        | 0        | 0   |
| S18FD00660_001 | *                                                                                       | 1        | 0       | 0        | 0        | 0   |
| S18FD00661_001 | *                                                                                       | 1        | 0       | 0        | 0        | 0   |
| S18FD01082_001 | 0                                                                                       | 0        | 0       | 0        | 0        | 0   |
| S18FD01083_001 | 0                                                                                       | 0        | 0       | 0        | 0        | 0   |
| S18FD01087_001 | 0                                                                                       | 0        | 0       | 0        | 0        | 0   |
| S18FD01091_001 | < 5ppm                                                                                  | 0        | 0       | 0        | 0        | 0   |
| S18FD01092_001 | 0                                                                                       | 0        | 0       | 0        | 0        | 0   |
| S18FD01094_001 | 0                                                                                       | 0        | 0       | 0        | 0        | 0   |
| S18FD01095_001 | 0                                                                                       | 0        | 0       | 0        | 0        | 0   |
| S18FD01110_001 | 5.6451                                                                                  | 1        | 0       | 0        | 0        | 0   |
| S18FD01116_001 | 6.0407                                                                                  | 1        | 0       | 0        | 0        | 0   |
| S18FD01118_001 | 4.4365                                                                                  | 1        | 0       | 0        | 0        | 0   |
| S18FD01122_001 | 10.2392                                                                                 | 1        | 0       | 0        | 0        | 0   |
| S18FD01123_001 | 10.7496                                                                                 | 1        | 0       | 0        | 0        | 0   |
| S17FD00986_001 | % declared dose NICOTINE (103.880 %), Mean Content NICOTINE (11.4271 mg/unit), NICOTINE | 1        | 0       | 0        | 0        | 0   |

|                |                                                                                                  |   |   |   |   |   |
|----------------|--------------------------------------------------------------------------------------------------|---|---|---|---|---|
| S17FD00988_001 | % declared dose NICOTINE (95.960 %), Mean Content NICOTINE (10.5555 mg/unit), NICOTINE           | 1 | 0 | 0 | 0 | 0 |
| S17FD00989 001 | % declared dose NICOTINE (102.080 %), Mean Content NICOTINE (16.3328 mg/unit), NICOTINE          | 1 | 0 | 0 | 0 | 0 |
| S17FD00992_001 | % declared dose NICOTINE (99.500 %), CAFFEINE, Mean Content NICOTINE (17.9104 mg/unit), NICOTINE | 1 | 0 | 0 | 0 | 0 |
| S17FD00993_001 | CAFFEINE                                                                                         | 0 | 0 | 1 | 0 | 0 |
| S17FD00994_001 | % declared dose NICOTINE (77.820 %), Mean Content NICOTINE (9.3389 mg/unit), NICOTINE            | 1 | 0 | 0 | 0 | 0 |
| S17FD00995_001 | CAFFEINE                                                                                         | 0 | 0 | 1 | 0 | 0 |
| S17FD0996 001  | % declared dose NICOTINE (106.970 %), Mean Content NICOTINE (6.4183 mg/unit), NICOTINE           | 1 | 0 | 0 | 0 | 0 |
| S17FD00998_001 | % declared dose NICOTINE (104.440 %), Mean Content NICOTINE (12.5322 mg/unit), NICOTINE          | 1 | 0 | 0 | 0 | 0 |
| S17FD0999 001  | Negative                                                                                         | 0 | 0 | 0 | 0 | 0 |
| S17FD01001 001 | % declared dose NICOTINE (102.660 %), Mean Content NICOTINE (12.3187 mg/unit), NICOTINE          | 1 | 0 | 0 | 0 | 0 |
| S17FD01002_001 | Negative                                                                                         | 0 | 0 | 0 | 0 | 0 |
| S17FD01003_001 | % declared dose NICOTINE (103.570 %), Mean Content NICOTINE (18.6420 mg/unit), NICOTINE          | 1 | 0 | 0 | 0 | 0 |

|                |                                                                                                   |   |   |   |   |   |
|----------------|---------------------------------------------------------------------------------------------------|---|---|---|---|---|
| S17FD01004_001 | % declared dose NICOTINE (100.750 %), Mean Content NICOTINE (6.0448 mg/unit), NICOTINE            | 1 | 0 | 0 | 0 | 0 |
| S17FD01005_001 | % declared dose NICOTINE (103.750 %), CAFFEINE, Mean Content NICOTINE (12.4495 mg/unit), NICOTINE | 1 | 0 | 1 | 0 | 0 |
| S17FD01006_001 | CAFFEINE                                                                                          | 0 | 0 | 1 | 0 | 0 |
| S17FD01007_001 | CAFFEINE                                                                                          | 0 | 0 | 1 | 0 | 0 |
| S17FD01008_001 | 0                                                                                                 | 0 | 0 | 0 | 0 | 0 |
| S17fd01009 001 | 0                                                                                                 | 0 | 0 | 0 | 0 | 0 |
| S17FD01010_001 | % declared dose NICOTINE (89.270 %), Mean Content NICOTINE (10.7119 mg/unit), NICOTINE            | 1 | 0 | 0 | 0 | 0 |
| S17FD01011 001 | 0                                                                                                 | 0 | 0 | 0 | 0 | 0 |
| S17FD01012_001 | % declared dose NICOTINE (118.550 %), Mean Content NICOTINE (14.2264 mg/unit), NICOTINE           | 1 | 0 | 0 | 0 | 0 |
| S17FD01015_001 | 0                                                                                                 | 0 | 0 | 0 | 0 | 0 |
| S17FD01017_001 | % declared dose NICOTINE (104.200 %),Mean Content NICOTINE (18.7559 mg/unit), NICOTINE            | 1 | 0 | 0 | 0 | 0 |
| S17FD01018_001 | % declared dose NICOTINE (101.750 %), Mean Content NICOTINE (18.3157 mg/unit), NICOTINE           | 1 | 0 | 0 | 0 | 0 |
| S17FD01019_001 | % declared dose NICOTINE (94.070 %), Mean Content NICOTINE (11.2886 mg/unit), NICOTINE            | 1 | 0 | 0 | 0 | 0 |
| S17FD01020 001 | 0                                                                                                 | 0 | 0 | 0 | 0 | 0 |

|                |                                                                                                    |   |   |   |   |   |
|----------------|----------------------------------------------------------------------------------------------------|---|---|---|---|---|
| S17FD01021_001 | % declared dose NICOTINE (102.820 %), Mean Content NICOTINE (12.3384 mg/unit), NICOTINE            | 1 | 0 | 0 | 0 | 0 |
| S17FD01022_001 | % declared dose NICOTINE (103.500 %), Mean Content NICOTINE (6.2099 mg/unit), NICOTINE             | 1 | 0 | 0 | 0 | 0 |
| S17FD01023_001 | % declared dose NICOTINE (100.090 %), Mean Content NICOTINE (6.0053 mg/unit), NICOTINE             | 1 | 0 | 0 | 0 | 0 |
| S17FD01024_001 | CAFFEINE, Identification NICOTINE (Negative)                                                       | 0 | 0 | 1 | 0 | 0 |
| S17FD01025_001 | % declared dose NICOTINE (102.080 %), CAFFEINE, Mean dose/unit NICOTINE (12.249 mg/unit), NICOTINE | 1 | 0 | 0 | 0 | 0 |
| S17FD01026_001 | 0                                                                                                  | 0 | 0 | 0 | 0 | 0 |
| S17FD01027_001 | % declared dose NICOTINE (105.620 %), Mean Content NICOTINE (12.6739 mg/unit), NICOTINE            | 1 | 0 | 0 | 0 | 0 |
| S17FD01028_001 | 0                                                                                                  | 0 | 0 | 0 | 0 | 0 |
| S17FD01029_001 | % declared dose NICOTINE (108.310 %), Mean Content NICOTINE (12.9969 mg/unit), NICOTINE            | 1 | 0 | 0 | 0 | 0 |
| S17FD01030_001 | 0                                                                                                  | 0 | 0 | 0 | 0 | 0 |
| S18FD00656-001 |                                                                                                    | 1 | 0 | 0 | 0 | 0 |
| S18FD1088_001  | 0                                                                                                  | 1 | 0 | 0 | 0 | 0 |
| S18FD1093_001  | 0                                                                                                  | 0 | 0 | 0 | 0 | 0 |
| S18FD1097_001  | 2.452                                                                                              | 1 | 0 | 0 | 0 | 0 |
| S18FD1099_001  | 2.829                                                                                              | 1 | 0 | 0 | 0 | 0 |
| S18FD01103-001 | 6.773                                                                                              | 1 | 0 | 0 | 0 | 0 |
| S18FD1104_001  | 6.061                                                                                              | 1 | 0 | 0 | 0 | 0 |

|                  |         |   |   |   |   |   |
|------------------|---------|---|---|---|---|---|
| S18FD1105_001    | 2.803   | 1 | 0 | 0 | 0 | 0 |
| S18FD1106_001    | 5.397   | 1 | 0 | 0 | 0 | 0 |
| S18FD1107_001    | 5.7644  | 1 | 0 | 0 | 0 | 0 |
| S18FD01109-001 ( | 44,262  | 1 | 0 | 0 | 0 | 0 |
| S18FD1111_001    | 5.5544  | 1 | 0 | 0 | 0 | 0 |
| S18FD1112_001    | 5.269   | 1 | 0 | 0 | 0 | 0 |
| S18FD01113-001   | 5.8732  | 1 | 0 | 0 | 0 | 0 |
| S18FD01114-001   | 5.8619  | 1 | 0 | 0 | 0 | 0 |
| S18FD1115_001    | 6.7644  | 1 | 0 | 0 | 0 | 0 |
| S18FD1119_001    | *       | 1 | 0 | 0 | 0 | 0 |
| S18FD1120_002    | *       | 1 | 0 | 0 | 0 | 0 |
| S18FD1121_003    | *       | 1 | 0 | 0 | 0 | 0 |
| S18FD1124_001    | *       | 1 | 0 | 0 | 0 | 0 |
| S18FD1125_005    | *       | 1 | 0 | 0 | 0 | 0 |
| S18FD1128_001    | *       | 1 | 0 | 0 | 0 | 0 |
| S18FD1131_001    | 18.3041 | 1 | 0 | 0 | 0 | 0 |
| S18FD1132_001    | 12.043  | 1 | 0 | 0 | 0 | 0 |
| S19FD2696_001    | 0       | 0 | 0 | 0 | 0 | 0 |
| S19FD2698_001    | 0.0000  | 0 | 0 | 0 | 0 | 0 |
| S19FD2700_001    | 5.6021  | 1 | 0 | 0 | 0 | 0 |
| S19FD2701_001    | 18.1896 | 1 | 0 | 0 | 0 | 0 |
| S19FD2702_001    | 19.2181 | 1 | 0 | 0 | 0 | 0 |
| S19FD2703_001    | 18.1589 | 1 | 0 | 0 | 0 | 0 |
| S19FD2705_001    | 12.8506 | 1 | 0 | 1 | 0 | 0 |
| S19FD2706_001    | 12.3301 | 1 | 0 | 0 | 0 | 0 |
| S19FD2710_001    | 11.3264 | 1 | 0 | 0 | 0 | 0 |
| S19FD2711_001    | 18.5494 | 1 | 0 | 0 | 0 | 0 |
| S19FD2712_001    | 19.1316 | 1 | 0 | 0 | 0 | 0 |
| S19FD2713_001    | 2.8388  | 1 | 0 | 0 | 0 | 0 |
| S19FD2714_001    | 10.4602 | 1 | 0 | 0 | 0 | 0 |
| S19FD2715_001    | 20.1244 | 1 | 0 | 0 | 0 | 0 |

|               |         |   |   |   |   |   |
|---------------|---------|---|---|---|---|---|
| S19FD2716_001 | 6.012   | 1 | 0 | 0 | 0 | 0 |
| S20FD2969_001 | 0       | 0 | 0 | 0 | 0 | 0 |
| S20FD2970     | 0       | 0 | 0 | 0 | 0 | 0 |
| S20FD2971_001 | <LOQ    | 1 | 0 | 0 | 0 | 0 |
| S20FD2972_001 | 11.2169 | 1 | 0 | 0 | 0 | 0 |
| S20FD2973_001 | 5.4456  | 1 | 0 | 0 | 0 | 0 |
| S20FD2974_001 | 5.6979  | 1 | 0 | 0 | 0 | 0 |
| S20FD2975_001 | 5.4482  | 1 | 0 | 0 | 0 | 0 |
| S20FD2979_001 | 5.7092  | 1 | 0 | 0 | 0 | 0 |
| S20FD2980_001 | 5.6999  | 1 | 0 | 0 | 0 | 0 |
| S20FD2981_001 | 6.9827  | 1 | 0 | 0 | 0 | 0 |
| S20FD2982_001 | 22.8184 | 1 | 0 | 0 | 0 | 0 |
| S20FD2983_001 | 0       | 0 | 0 | 0 | 0 | 0 |
| S20FD2984_001 | 11.4845 | 1 | 0 | 0 | 0 | 0 |
| S20FD2985_001 | 20.5109 | 1 | 0 | 0 | 0 | 0 |
| S20FD2986_001 | 6.1002  | 1 | 0 | 0 | 0 | 0 |
| S20FD2987_001 | 0       | 0 | 0 | 0 | 0 | 0 |
| S20FD2988_001 | 0       | 0 | 0 | 0 | 0 | 0 |
| S20FD2989_001 | 0       | 0 | 0 | 0 | 0 | 0 |
| S20FD2990_001 | 12.1079 | 1 | 0 | 0 | 0 | 0 |
| S20FD2991_001 | 12.2687 | 1 | 0 | 1 | 0 | 0 |
| S20FD2992     | 0       | 0 | 0 | 0 | 0 | 0 |
| S20FD2993_001 | <LOQ    | 1 | 0 | 0 | 0 | 0 |
| S20FD2995_001 | 0       | 0 | 0 | 0 | 0 | 0 |
| S21FD3026     | 10.22   | 1 | 0 | 0 | 0 | 0 |
| S21FD3027     | 5.87    | 1 | 0 | 0 | 0 | 0 |
| S21FD3028     | 6.04    | 1 | 0 | 0 | 0 | 0 |
| S21FD3030     | *       | 1 | 0 | 0 | 0 | 0 |
| S21FD03031    | 5.95    | 1 | 0 | 0 | 0 | 0 |
| S21FD03032    | 12.66   | 1 | 0 | 0 | 0 | 0 |
| S21FD3033     | 19.47   | 1 | 0 | 0 | 0 | 0 |

|            |                     |   |   |   |   |   |
|------------|---------------------|---|---|---|---|---|
| S21FD3034  | *                   | 1 | 0 | 0 | 0 | 0 |
| S21FD3036  | 0                   | 0 | 0 | 0 | 0 | 0 |
| S21FD03037 | 0                   | 0 | 0 | 0 | 0 | 0 |
| S21FD03038 | 0                   | 0 | 0 | 0 | 0 | 0 |
| S21FD03040 | 13.53               | 1 | 0 | 0 | 0 | 0 |
| S21FD3042  | 20.02 ( $\pm$ 0.96) | 1 | 0 | 0 | 0 | 0 |
| S21FD03043 | 2.81                | 1 | 0 | 0 | 0 | 0 |
| S21FD03044 | 5.43                | 1 | 0 | 1 | 0 | 0 |
| S21FD03046 | 5.24                | 1 | 0 | 0 | 0 | 0 |
| S21FD03049 | 5.95                | 1 | 0 | 0 | 0 | 0 |
| S21FD03050 | 10.50               | 1 | 0 | 0 | 0 | 0 |
| S21FD3051  | 0                   | 0 | 0 | 0 | 0 | 0 |
| S21FD3052  | 4.63                | 1 | 0 | 0 | 0 | 0 |
| S21FD03053 | 0                   | 0 | 0 | 0 | 0 | 0 |
| S21FD03054 | 0                   | 0 | 0 | 0 | 0 | 0 |
| S21FD03055 | 0.18                | 1 | 0 | 0 | 0 | 0 |
| S21FD3076  | *                   | 1 | 0 | 0 | 0 | 0 |
| S21FD3778  | *                   | 1 | 0 | 0 | 0 | 0 |
| S21FD3780  | *                   | 1 | 0 | 0 | 0 | 0 |
| S21FD3781  | *                   | 1 | 0 | 0 | 0 | 0 |
| S21FD3782  | *                   | 1 | 0 | 0 | 0 | 0 |
| S21FD3783  | *                   | 1 | 0 | 0 | 0 | 0 |
| S21FD03784 | *                   | 1 | 0 | 0 | 0 | 0 |
| Sample_001 | 5.87                | 1 | 0 | 1 | 0 | 0 |
| Sample_002 | 6.04                | 1 | 0 | 1 | 0 | 0 |
| Sample_003 | 5.95                | 1 | 0 | 1 | 0 | 0 |
| Sample_004 | 19.47               | 1 | 0 | 1 | 0 | 0 |
| Sample_005 | 7.28                | 1 | 0 | 1 | 0 | 0 |
| Sample_006 | 0                   | 0 | 0 | 1 | 0 | 0 |
| Sample_007 | 0                   | 0 | 0 | 1 | 0 | 0 |
| Sample_008 | 0                   | 0 | 0 | 1 | 0 | 0 |

|            |         |   |   |   |   |   |
|------------|---------|---|---|---|---|---|
| Sample_009 | 0       | 0 | 0 | 1 | 0 | 0 |
| Sample_010 | 13.53   | 1 | 0 | 1 | 0 | 0 |
| Sample_011 | 10.50   | 1 | 0 | 1 | 0 | 0 |
| Sample_012 | 0       | 0 | 0 | 1 | 0 | 0 |
| Sample_013 | 0       | 0 | 0 | 1 | 0 | 0 |
| Sample_014 | 0       | 0 | 0 | 0 | 0 | 1 |
| Sample_015 | <LOQ    | 0 | 0 | 0 | 0 | 1 |
| Sample_016 | 11.2169 | 1 | 0 | 0 | 0 | 1 |
| Sample_017 | 5.4456  | 1 | 0 | 0 | 0 | 1 |
| Sample_018 | 5.7092  | 1 | 0 | 0 | 0 | 1 |
| Sample_019 | 5.6999  | 1 | 0 | 0 | 0 | 1 |
| Sample_020 | 6.9827  | 1 | 0 | 0 | 0 | 1 |
| Sample_021 | 0       | 0 | 0 | 1 | 0 | 1 |
| Sample_022 | 11.4845 | 1 | 0 | 0 | 0 | 1 |
| Sample_023 | 20.5109 | 1 | 0 | 0 | 0 | 1 |
| Sample_024 | 12.1079 | 1 | 0 | 0 | 0 | 1 |
| Sample_025 | 12.2687 | 1 | 0 | 0 | 0 | 1 |
| Sample_026 | <LOQ    | 0 | 0 | 0 | 0 | 1 |
| Sample_027 | 0       | 0 | 0 | 0 | 1 | 0 |
| Sample_028 | 0       | 0 | 0 | 0 | 1 | 0 |
| Sample_029 | 0       | 0 | 0 | 0 | 1 | 0 |
| Sample_030 | 0       | 0 | 0 | 0 | 1 | 0 |
| Sample_031 | 2.452   | 1 | 0 | 0 | 1 | 0 |
| Sample_032 | 2.452   | 1 | 0 | 0 | 1 | 0 |
| Sample_033 | 6.061   | 1 | 0 | 0 | 1 | 0 |
| Sample_034 | 2.803   | 1 | 0 | 0 | 1 | 0 |
| Sample_035 | 5.8619  | 1 | 0 | 0 | 1 | 0 |
| Sample_036 | 6.7644  | 1 | 0 | 0 | 1 | 0 |
| Sample_037 | 6.0407  | 1 | 0 | 0 | 1 | 0 |
| Sample_038 | 12.043  | 1 | 0 | 0 | 1 | 0 |
| Sample_039 | 0       | 0 | 1 | 0 | 0 | 0 |



|            |        |   |   |   |   |   |
|------------|--------|---|---|---|---|---|
| Sample_040 | 0      | 0 | 1 | 0 | 0 | 0 |
| Sample_041 | 5.6979 | 1 | 1 | 0 | 0 | 0 |
| Sample_042 | 5.4482 | 1 | 1 | 0 | 0 | 0 |
| Sample_043 | 0      | 0 | 1 | 0 | 0 | 0 |
| Sample_044 | 0      | 0 | 1 | 0 | 0 | 0 |
| Sample_045 | 0      | 0 | 1 | 0 | 0 | 0 |
| Sample_046 | 0      | 0 | 1 | 0 | 0 | 0 |
| Sample_047 | 10.22  | 1 | 1 | 0 | 0 | 0 |
| Sample_048 | 0      | 0 | 1 | 0 | 0 | 0 |
| Sample_049 | 18.85  | 1 | 1 | 0 | 0 | 0 |
| Sample_050 | 5.95   | 1 | 1 | 0 | 0 | 0 |
| Sample_051 | 0      | 0 | 1 | 0 | 0 | 0 |
| Sample_052 | 0      | 1 | 0 | 0 | 0 | 0 |
| Sample_053 | 0      | 1 | 0 | 0 | 0 | 0 |
| Sample_054 | 0      | 1 | 0 | 0 | 0 | 0 |
| Sample_055 | 0      | 1 | 0 | 0 | 0 | 0 |
| Sample_056 | 0      | 1 | 0 | 0 | 0 | 0 |
| Sample_057 | 0      | 1 | 0 | 0 | 0 | 0 |
| Sample_058 | 0      | 1 | 0 | 0 | 0 | 0 |
| Sample_059 | 0      | 1 | 0 | 0 | 0 | 0 |
| Sample_060 | 0      | 1 | 0 | 0 | 0 | 0 |
| Sample_061 | 0      | 1 | 0 | 0 | 0 | 0 |
| Sample_062 | 0      | 1 | 0 | 0 | 0 | 0 |
| Sample_063 | 0      | 1 | 0 | 0 | 0 | 0 |
| Sample_064 | 0      | 1 | 0 | 0 | 0 | 0 |
| Sample_065 | 0      | 1 | 0 | 0 | 0 | 0 |
| Sample_066 | 0      | 1 | 0 | 0 | 0 | 0 |
| Sample_067 | 0      | 1 | 0 | 0 | 0 | 0 |
| Sample_068 | 0      | 1 | 0 | 0 | 0 | 0 |
| Sample_069 | 0      | 1 | 0 | 0 | 0 | 0 |
| Sample_070 | 0      | 1 | 0 | 0 | 0 | 0 |

|            |   |   |   |   |   |   |
|------------|---|---|---|---|---|---|
| Sample_071 | 0 | 1 | 0 | 0 | 0 | 0 |
| Sample_072 | 0 | 1 | 0 | 0 | 0 | 0 |
| Sample_073 | 0 | 1 | 0 | 0 | 0 | 0 |
| Sample_074 | 0 | 1 | 0 | 0 | 0 | 0 |
| Sample_075 | 0 | 1 | 0 | 0 | 0 | 0 |
| Sample_076 | 0 | 1 | 0 | 0 | 0 | 0 |
| Sample_077 | 0 | 1 | 0 | 0 | 0 | 0 |
| Sample_078 | 0 | 1 | 0 | 0 | 0 | 0 |
| Sample_079 | 0 | 1 | 0 | 0 | 0 | 0 |
| Sample_080 | 0 | 1 | 0 | 0 | 0 | 0 |
| Sample_081 | 0 | 1 | 0 | 0 | 0 | 0 |
| Sample_082 | 0 | 1 | 0 | 0 | 0 | 0 |
| Sample_083 | 0 | 1 | 0 | 0 | 0 | 0 |
| Sample_084 | 0 | 1 | 0 | 0 | 0 | 0 |

\* = no of samples on which GC was  
not carried out, but used in the  
experiment

1 =Present in the sample.

0= Absent in the sample
